# Supplementary material for: Enhancement of 211At Uptake via the Sodium Iodide Symporter by the Addition of Ascorbic Acid in Targeted α-Therapy of Thyroid Cancer
Source: PubMed Central journal article supplement (PMC6735285; doi:10.2967/jnumed.118.222638), 2019-09
Supplement: jnm222638SupplementalData.pdf [file jnm222638SupplementalData.pdf]

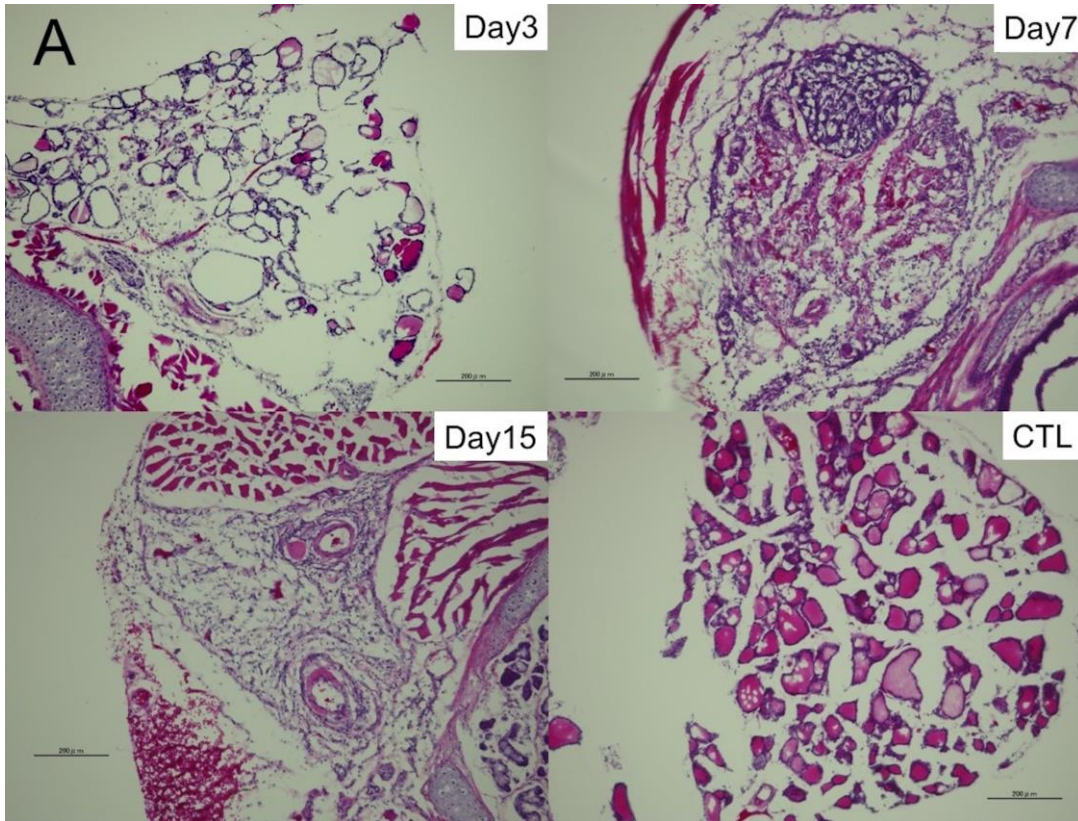

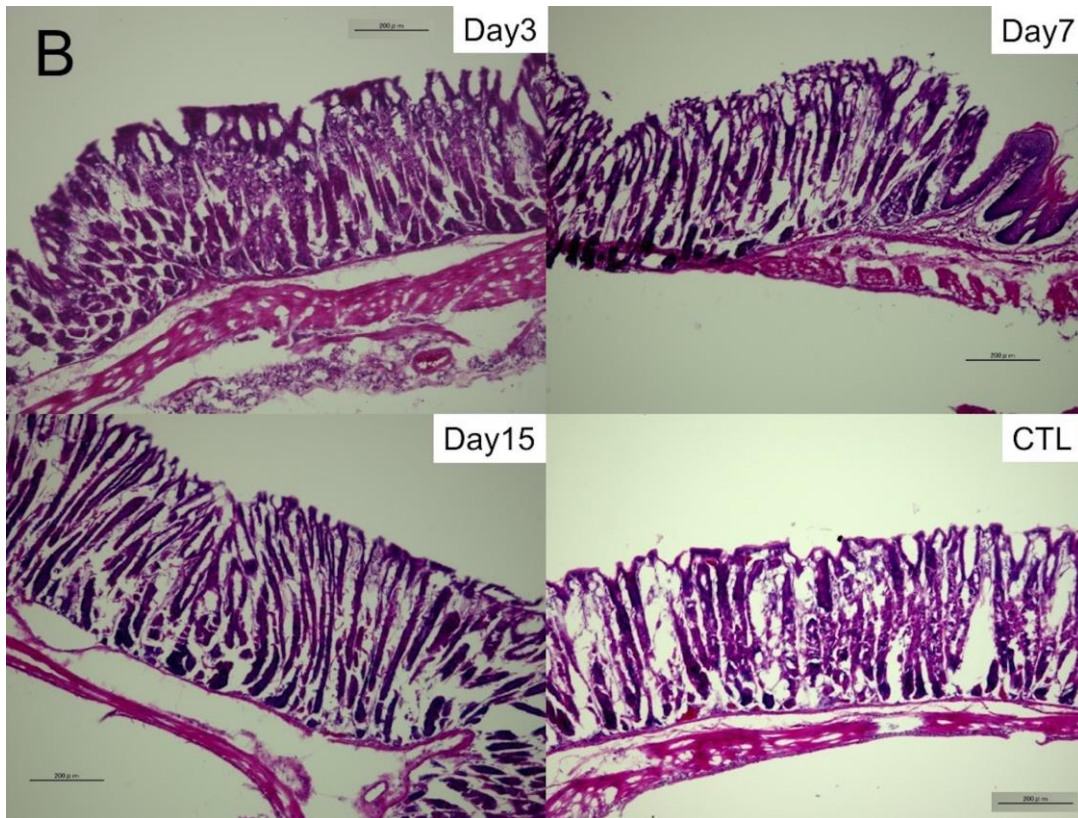

**Supplemental figure 1.** H&E staining of the (A) thyroid gland and (B) stomach in normal ICR mice at 3, 7 and 15 days after administration of AA(+)<sup>211</sup>At solution (1 MBq) and control (CTL). Bar indicates 200 $\mu$ m.

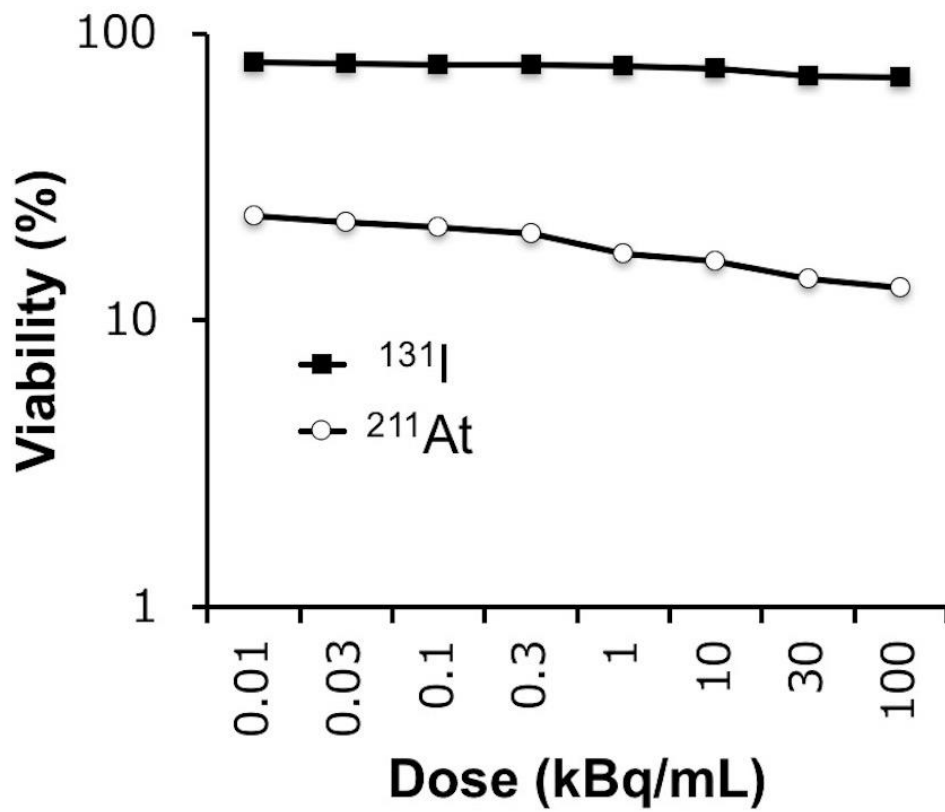

**Supplemental figure 2.** *In-vitro* cellular survival assay using K1-NIS cells for the comparison between  $^{131}\text{I}$  and AA(+)  $^{211}\text{At}$ .
